# Supplementary material
Source: publisher site journal article supplement (https://www.dovepress.com/article/303739)
Supplement: Supplementary file 1 [file get_supplementary_file.php]

**Supplementary materials**


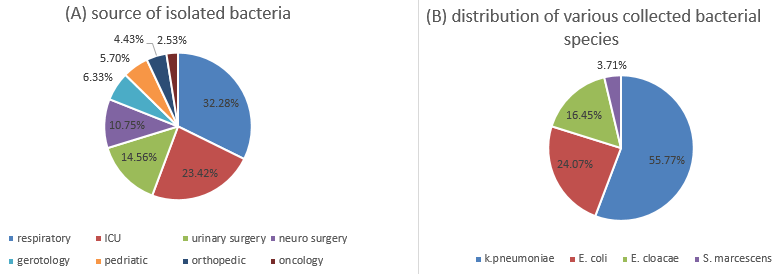


**Supplement Figure 1.** A represents the source of isolated bacteria, and B represents the distribution of various collected bacterial species.

**Supplement Figure 2.** Represents the distribution source of bacterial species.


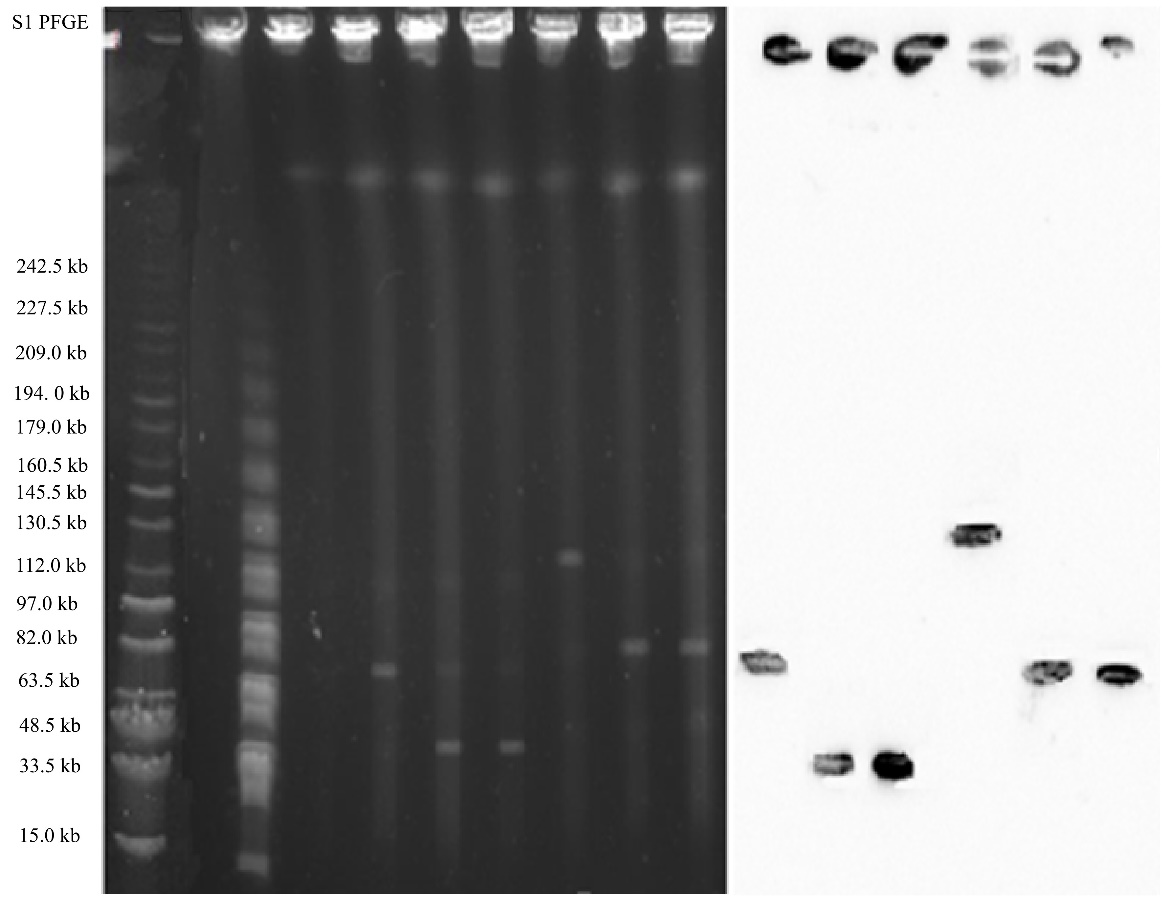


**Supplement Figure 3.** S1-nuclease pulsed-ﬁeld gel electrophoresis proﬁles of six and Southern Blot hybridization of six isolates carrying the *mcr-1* plasmid. Reading from left to right 1= 70 kb IncFIIk, 2= 35 kb IncFII, 3=35 kb IncFII, 4=120 kb IncFIIK, 5= 70kb IncF 6=70 kb IncF.


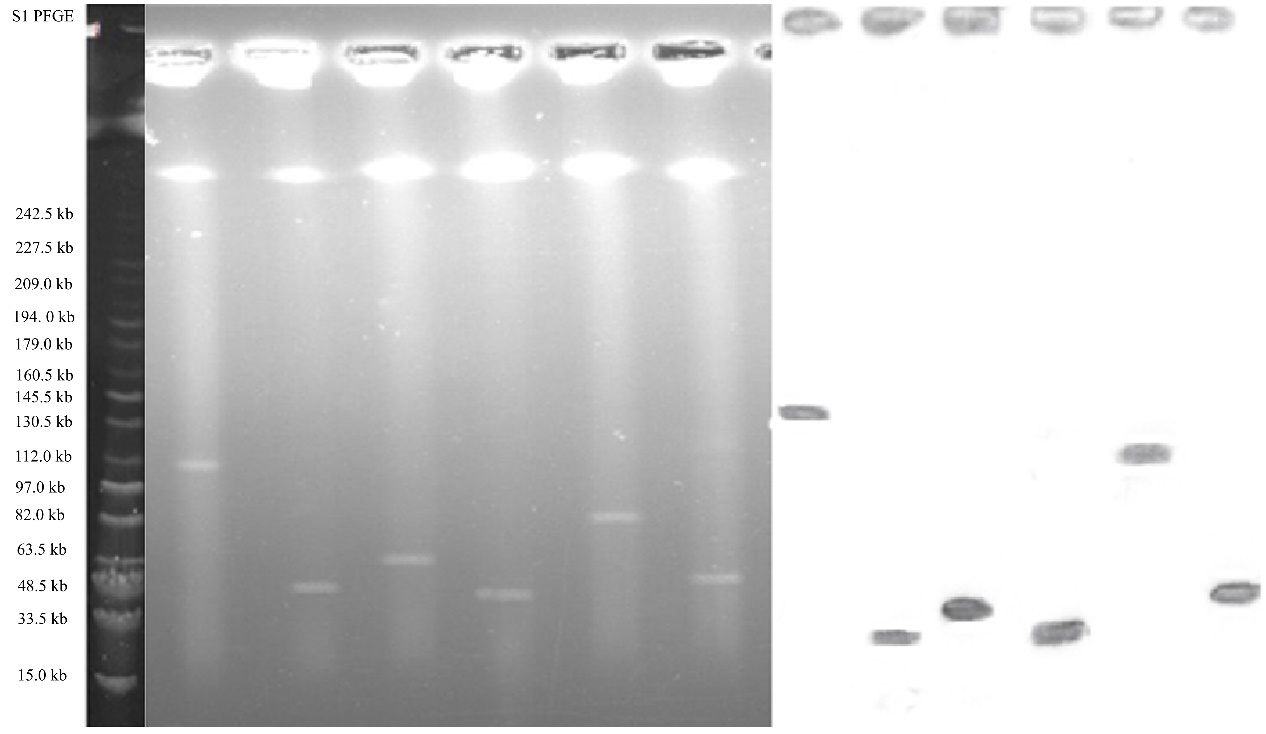


**Supplement Figure 4.** S1**-**nuclease pulsed-ﬁeld gel electrophoresis proﬁles of six and Southern Blot hybridization of six isolates carrying the *bla*KPC-2 plasmid. Reading from left to right 1= IncR 100 kb, 2=35 kb IncFII, 3= 50 kb IncA/C 4= 35 kb IncFII 5= 70 kb IncFIIK 6= 35 kb IncFII.


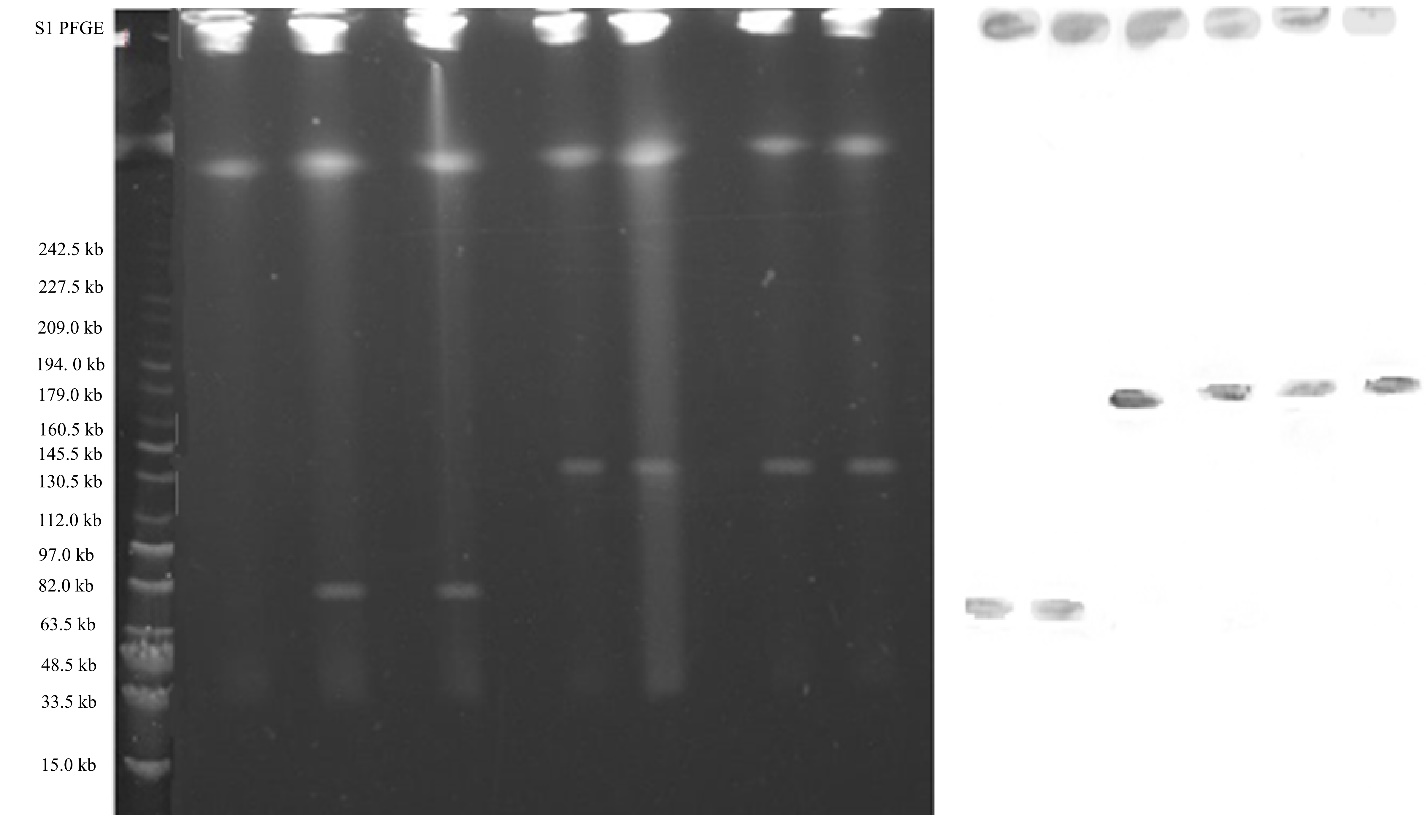


**Supplement Figure 5.** S1-nuclease pulsed-ﬁeld gel electrophoresis proﬁles of six and Southern Blot hybridization of six isolates carrying the *bla*NDM-1plasmid. Reading from left to right 1=70kb IncFII, 2=70 kb IncFII, from three to six, all are 120 kb IncHI2.

**Supplement Table 1.** Isolation and prevalence of bacterial isolates from various collection units

| Collection Units | N (%) | *Klebsiella pneumoniae* | *Escherichia coli* | *Enterobacter cloacae* | *Serratia marcescens* |
| --- | --- | --- | --- | --- | --- |
| Reparatory medicines | 51(32.2) | 33 | 11 | 4 | 3 |
| Intensive care unit | 37(23.4) | 28 | 3 | 5 | 1 |
| Urinary surgery | 23(14.4) | 3 | 10 | 8 | 2 |
| Neurosurgery | 17(10.7) | 11 | 4 | 2 | - |
| Gerontology | 10(6.3) | 5 | 3 | 2 | - |
| Pediatric | 9(5.6) | 4 | 4 | 1 | - |
| Orthopedic | 7(4.4) | 2 | 2 | 3 | - |
| Oncology | 4(2.5) | 2 | 1 | 1 | - |
| Total | 158 | 88 | 38 | 26 | 6 |

**Supplement Table 2.** Representing the primers used in our study.

| Primers | Sequence (5`-3`) | Annealing temperature | Amplicon size (bp) | Reference |
| --- | --- | --- | --- | --- |
| *Mcr-1* F  *Mcr-1* R | CGGTCAGTCCGTTTGTTC  CTTGGTCGGTCTGTAGGG | *58º* | 309 | [1] |
| *bla*KPC-2 F  *bla*KPC-2 R | TGTTGCTGAAGGAGTTGGGC  ACGACGGCATAGTCATTTGC | *56º* | 340 | [2] |
| *bla*NDM-1F  *bla*NDM-1R | GGTTTGGCGATCTGGTTTTC  CGGAATGGCTCATCACGATC | 56º | 621 | [3] |
| *bla*CTXM F  *bla*CTXM R | CGCTTTGCGATGTGCAG  ACCGCGATATCGTTGGT | 55º | 550 | [4] |
| *bla*OXA F  *bla*OXA R | GCGTGGTTAAGGATGAACAC  CATCAAGTTCAACCCAACCG | 56º | 438 | [1] |
| *fosA3* F  *fosA3R* | GCGTCAAGCCTGGCATTT  GCCGTCAGGGTCGAGAAA | 56º | 282 | [5] |
| 16s F  16s R | GGTTGGCCAATCTACTCCCAGG  TGGTCTCCTTAAACCTGTCTTG | 55º | 1500 | [6] |

[1] Kiaei S, Moradi M, Hosseini-Nave H, Ziasistani M, Kalantar-Neyestanaki DJI, resistance d Endemic dissemination of different sequence types of carbapenem-resistant Klebsiella pneumoniae strains harboring blaNDM and 16S rRNA methylase genes in Kerman hospitals, Iran, from 2015 to 2017. 2019; **12**: 45.

[2] Talebi M, Najar-Peerayeh S, Bakhshi BJGR Hidden carbapenem resistance in the community-and hospital-associated OXA-48 gene-carrying uropathogenic Escherichia coli. 2020; **21**: 100897.

[3] Shariati A, Azimi T, Ardebili A *et al.* Insertional inactivation of oprD in carbapenem-resistant Pseudomonas aeruginosa strains isolated from burn patients in Tehran, Iran. 2018; **21**: 75-80.

[4] Bhattacharjee A, Sen MR, Prakash P, Anupurba SJJoac Role of β-lactamase inhibitors in enterobacterial isolates producing extended-spectrum β-lactamases. 2008; **61**: 309-14.

[5] White BP, Stover KR, Barber KE, Galloway RC, Sullivan DC, King STJIjoaa Mechanisms of fosfomycin resistance in carbapenem-resistant Enterobacter sp. 2017; **50**: 690-2.

[6] Kai S, Matsuo Y, Nakagawa S *et al.* Rapid bacterial identification by direct PCR amplification of 16S rRNA genes using the MinION™ nanopore sequencer. 2019; **9**: 548-57.
